# Supplementary figures and images for: Bridging the Species Gap: Morphological and Molecular Comparison of Feline and Human Intestinal Carcinomas
Source: MDPI journal article supplement (doi:10.3390/cancers13235941), 2021-11-25

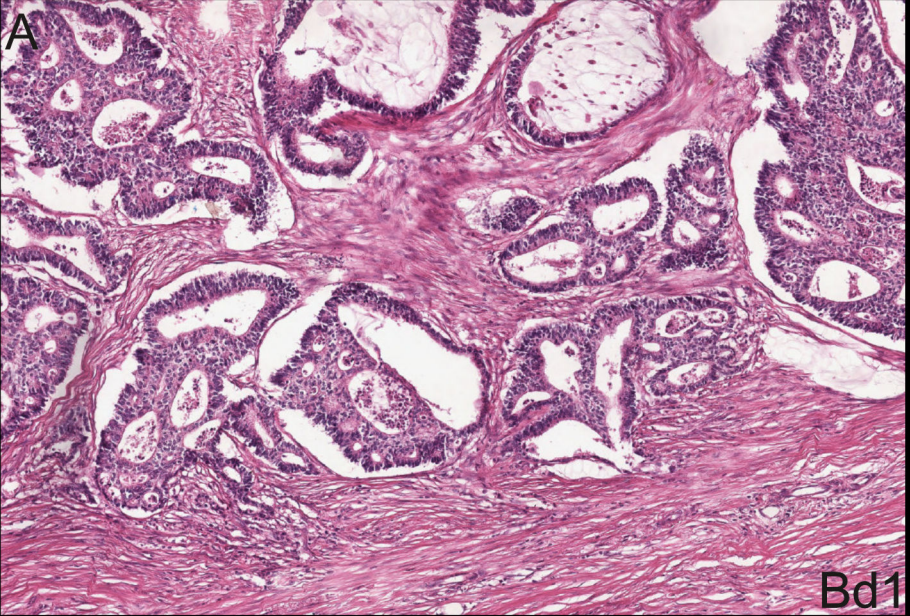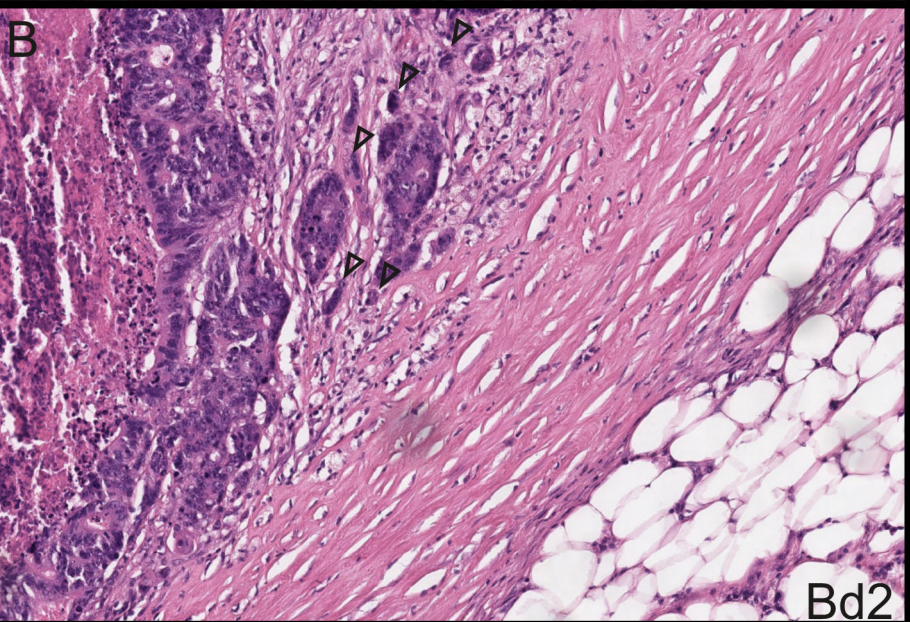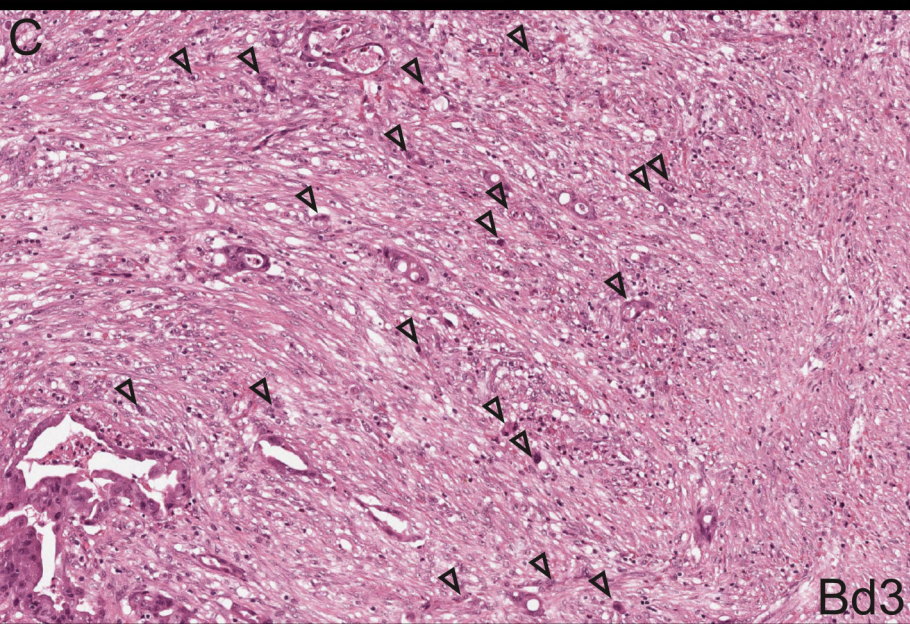

Supplement: s1 [file s1]

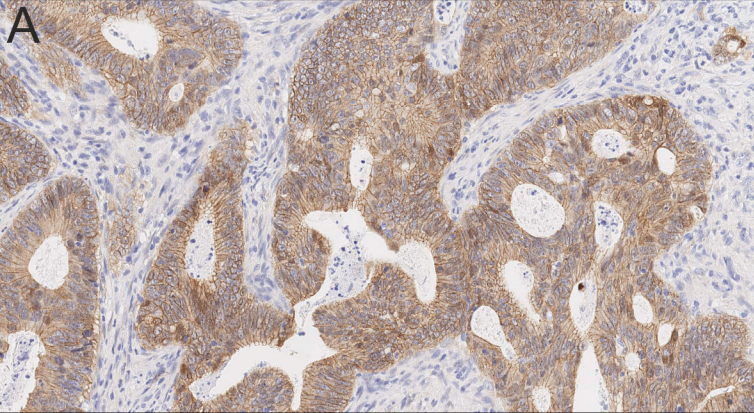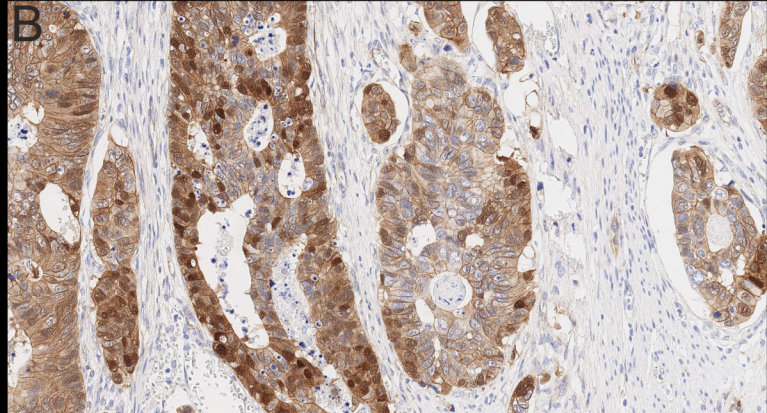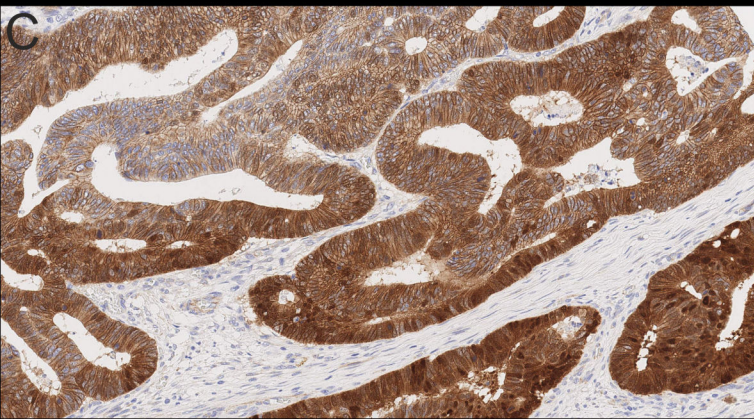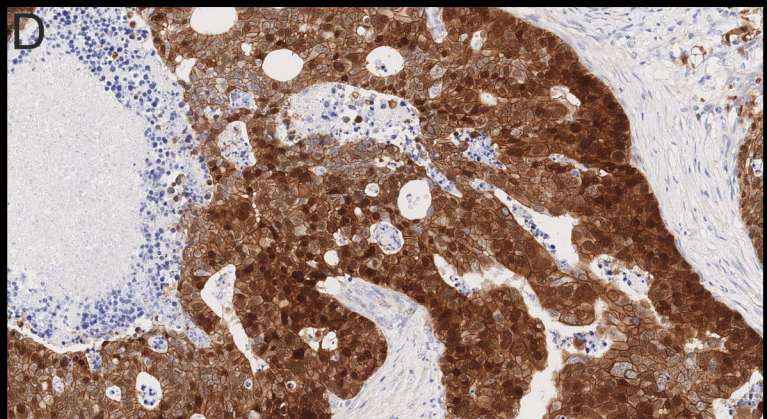

Supplement: s1 [file s1]
